# Supplementary material for: Protective effect of hydroxychloroquine on infections in patients with systemic lupus erythematosus: an observational study using the LUNA registry
Source: PubMed Central journal article supplement (PMC10504661; doi:10.3389/fimmu.2023.1227403), 2023-09-01
Supplement: Table_1.pdf [file Table_1.pdf]

**Supplemental Table 1 Generalized estimating equation logistic regression model for the risk of severe infections with cyclophosphamide and rituximab as independent variables.**

|                                       | <b>Odds ratio (95% CI)</b> | <b><i>p</i> Value</b> |
|---------------------------------------|----------------------------|-----------------------|
| Sex (female)                          | 1.271 (0.584-2.768)        | 0.55                  |
| Age                                   | 1.044 (1.028-1.061)        | < 0.001               |
| Glucocorticoid <sup>a</sup>           | 1.896 (1.334-2.694)        | < 0.001               |
| Cyclophosphamide                      | 3.160 (0.505-19.788)       | 0.22                  |
| Rituximab                             | 16.680 (4.761-58.446)      | < 0.001               |
| Other immunosuppressants <sup>b</sup> | 1.359 (0.854-2.163)        | 0.20                  |
| SLEDAI                                | 0.985 (0.938-1.035)        | 0.56                  |
| Hydroxychloroquine                    | 0.606 (0.335-1.099)        | 0.099                 |

<sup>a</sup>Prednisolone equivalent dose was log-transformed for statistical analysis.

<sup>b</sup>At least one of the following: mycophenolate mofetil, mizoribine, methotrexate, azathioprine, tacrolimus, cyclosporine, belimumab.

*CI*, confidence interval; *SLEDAI*, Systemic Lupus Erythematosus Disease Activity Index.
